# Supplementary material for: High-affinity chimeric antigen receptor signaling induces an inflammatory program in human regulatory T cells
Source: PubMed Central journal article supplement — Mol Ther Methods Clin Dev. 2024 Nov 18;32(4):101385. doi: 10.1016/j.omtm.2024.101385 (PMC11647616; doi:10.1016/j.omtm.2024.101385), 2024-11-18
Supplement: mmc1.pdf [file mmc1.pdf]

**OMTM, Volume 32**

**Supplemental information**

**High-affinity chimeric antigen receptor  
signaling induces an inflammatory program  
in human regulatory T cells**

**Russell W. Cochrane, Rob A. Robino, Bryan Granger, Eva Allen, Silvia Vaena, Martin J. Romeo, Aguirre A. de Cubas, Stefano Berto, and Leonardo M.R. Ferreira**

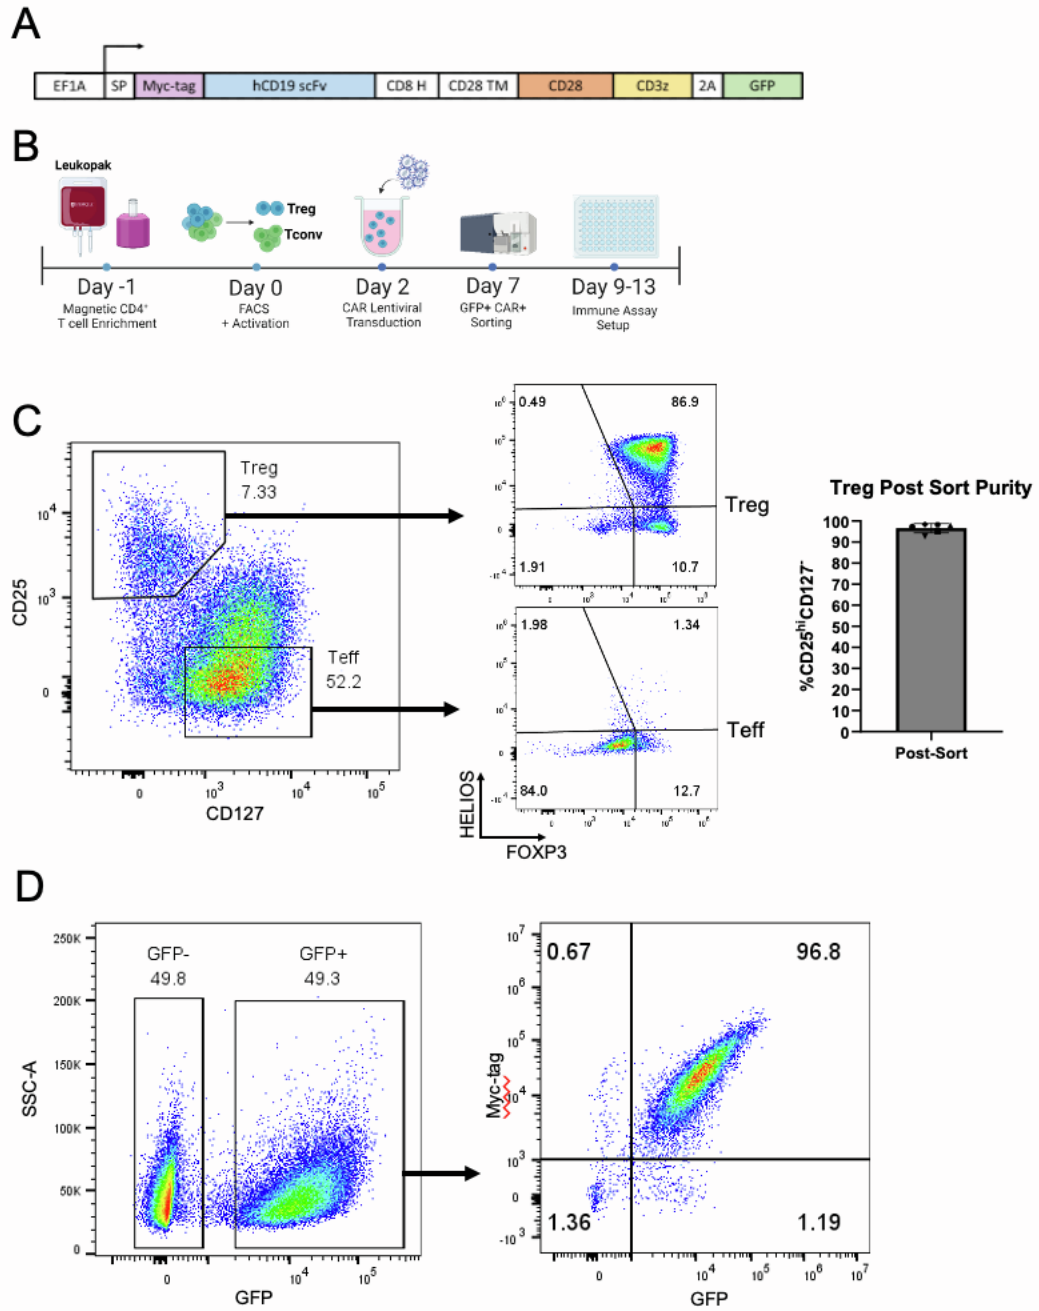

**Figure S1. Human CAR Treg generation.** (A) Chimeric antigen receptor (CAR) construct used in this study. (B) Workflow to isolate human CD4<sup>+</sup> regulatory T cells (Tregs) and effector T cells (Teff), introduce a CAR, expand, and sort CAR-expressing cells for immune assays. (C) Representative dot plots of Treg sorting strategy with CD25<sup>hi</sup>CD127<sup>low</sup> Tregs and CD25<sup>low</sup>CD127<sup>hi</sup> Teff on the left and Treg post sort phenotype assessment with FOXP3<sup>+</sup>HELIOS<sup>+</sup> Tregs and FOXP3<sup>-</sup>HELIOS<sup>-</sup> Teff cells on the right. Post-sort purity of CD25<sup>hi</sup>CD127<sup>low</sup> Tregs across multiple donors (n=6). (D) Representative dot plots of Treg transduction efficiency with CD19CAR-2A-GFP lentivirus, based on GFP expression on the left and CAR surface expression (Myc-tag) and reporter gene expression (GFP) after sorting GFP<sup>+</sup> cells on the right.

**A**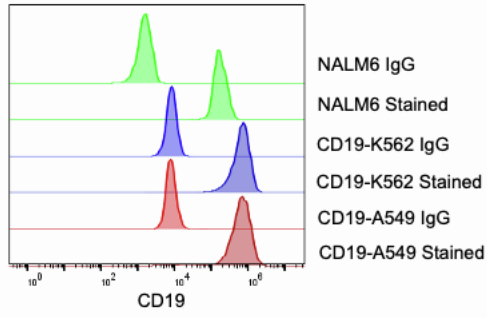**B**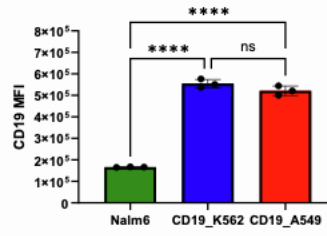**C**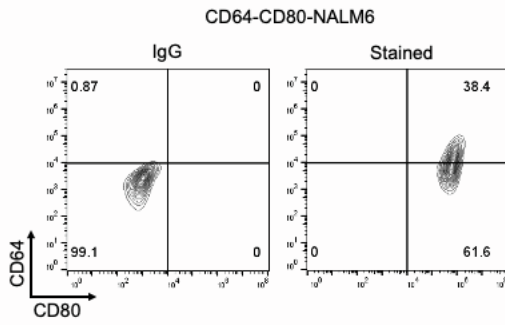**D**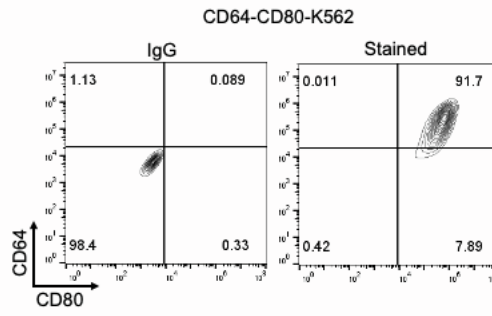**E**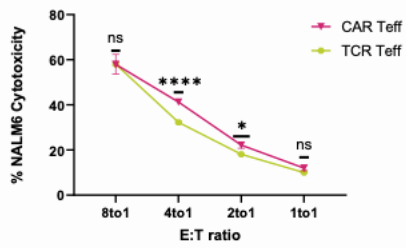**F**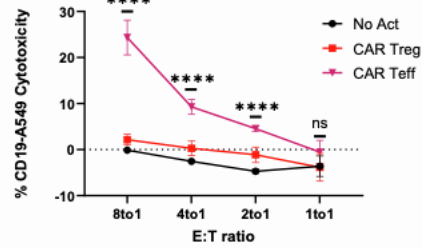

**Figure S2. Characterization of target cell lines and cytotoxicity towards them.** (A) Histograms of CD19 surface expression on CD19-K562, NALM6, and CD19-A549 target cells. (B) Mean fluorescence intensity (MFI) of CD19 surface expression on CD19-K562, NALM6, and CD19-A549 target cells. (C) Contour plot of CD80 and CD64 surface expression on CD64-CD80-NALM6 cells. (D) Contour plot of CD80 and CD64 surface expression on CD64-CD80-K562 cells. (E) Effector T (Teff) cell cytotoxicity towards NALM6 cells at different effector to target (E:T) ratios. (F) Treg and Teff cytotoxicity towards CD19-A549 cells at different E:T ratios. Values represent technical replicates of representative experiment. Bars represent mean  $\pm$  standard deviation (SD). To determine statistical significance, one way ANOVA with Tukey's multiple comparison correction was used in Figure S2B, and two-way ANOVA test with Tukey's multiple comparison correction was used in Figure S2E and S2F. \*\*\*\*,  $p < 0.0001$ ; \*\*\*,  $p < 0.001$ ; \*\*,  $p < 0.01$ ; \*,  $p < 0.05$ ; ns, not significant.

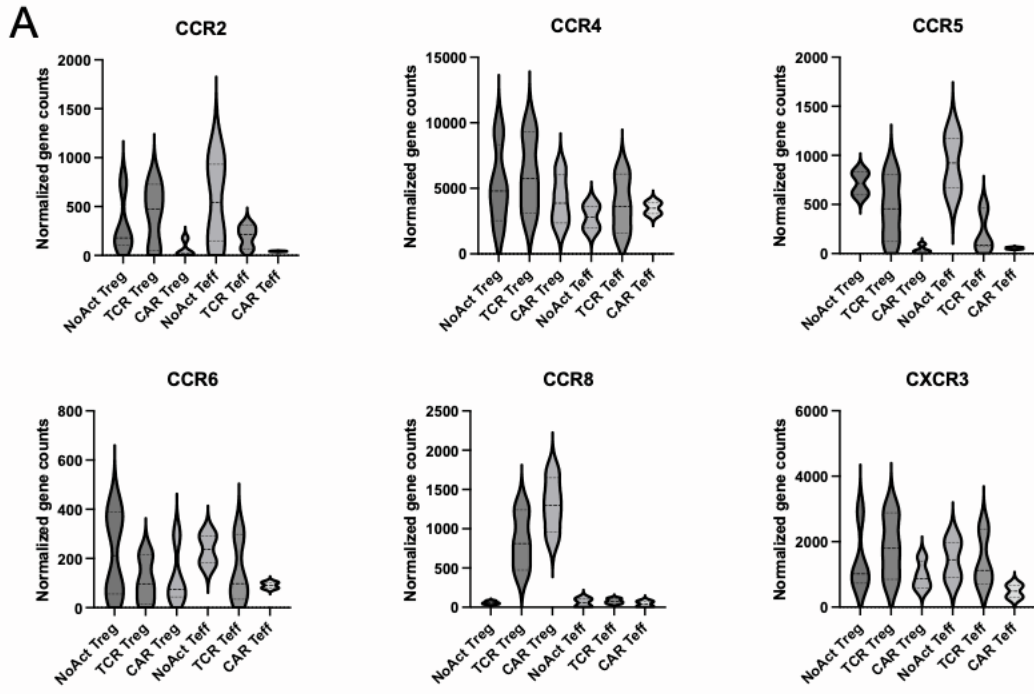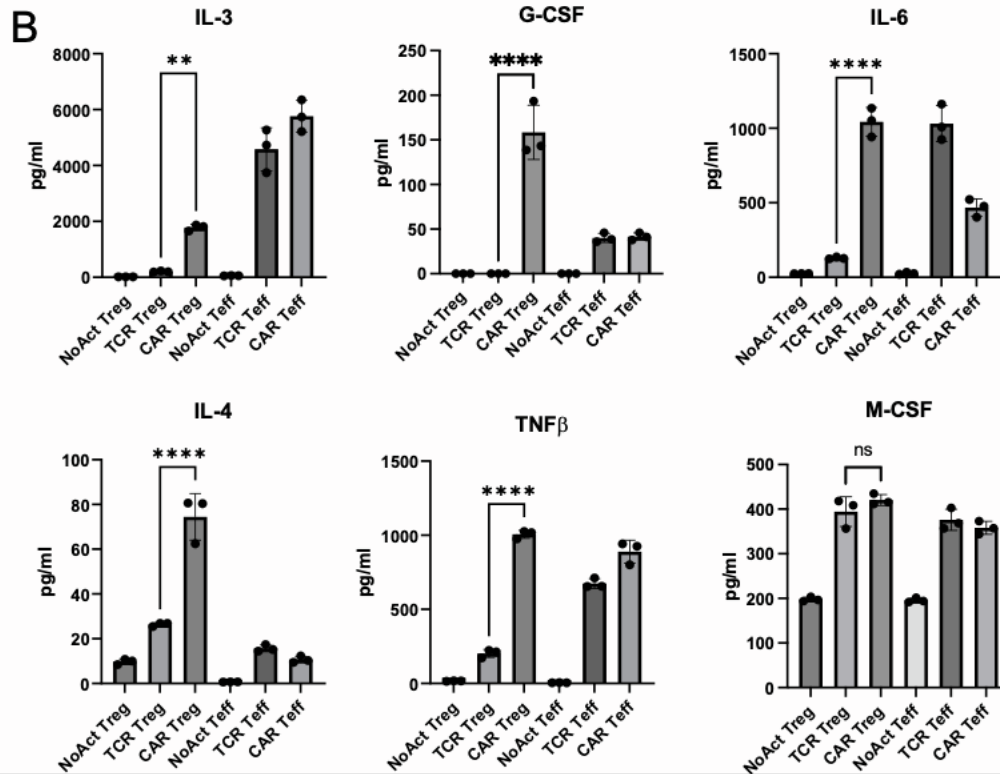

**Figure S3. Chemokine and Cytokine Expression of Tregs and Teff cells.** (A) Chemokine receptor gene expression levels in No Act Tregs, TCR Tregs, CAR Tregs, No Act Teff, TCR Teff, and CAR Teff 24 hours post activation. Violins represent mean  $\pm$  standard deviation (SD) of RNA-seq gene counts across blood donors. (B) Cytokine secretion levels by No Act Tregs, TCR Tregs, CAR Tregs, No Act Teff, TCR Teff, and CAR Teff 48 hours post activation. Values represent technical replicates of representative experiment. Bars represent mean  $\pm$  SD. One-way ANOVA test with Tukey's multiple comparison correction was used to assess statistical significance. \*\*\*\*,  $p < 0.0001$ ; \*\*\*,  $p < 0.001$ ; \*\*,  $p < 0.01$ ; \*,  $p < 0.05$ ; ns, not significant.

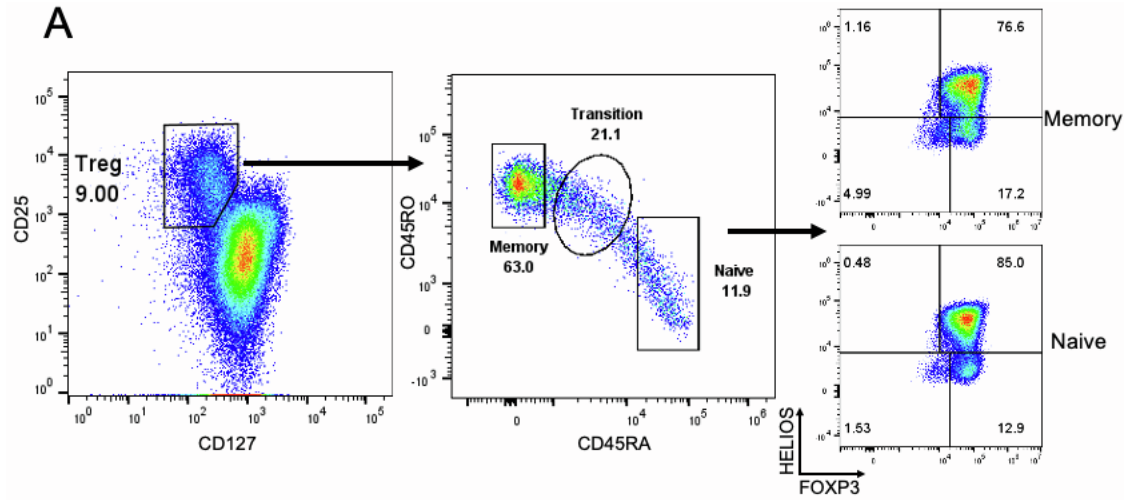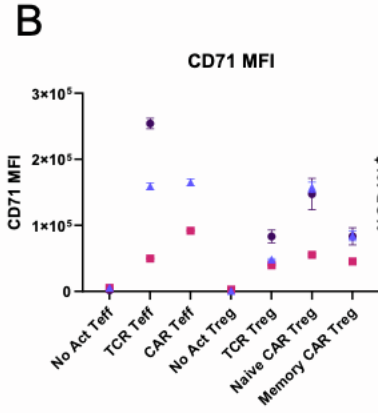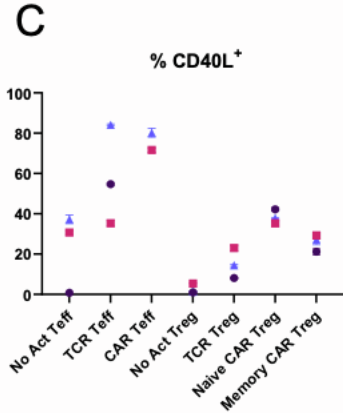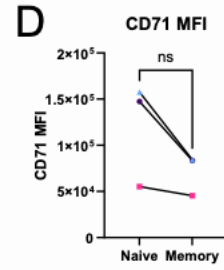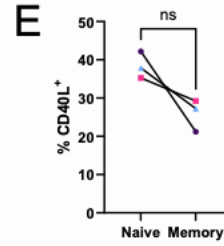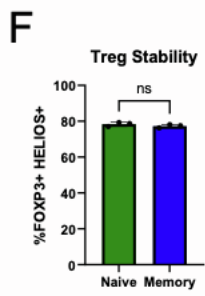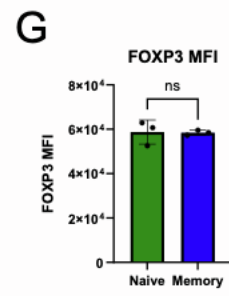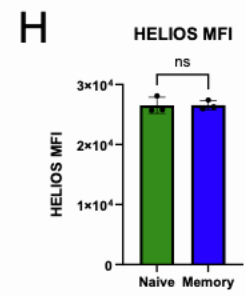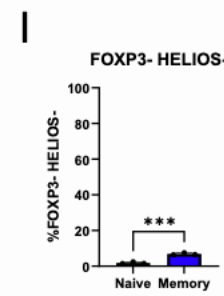



**Figure S4. CAR activation in naïve or memory Tregs results in phenotypically similar Tregs.**

(A) Representative dot plots of sorting strategy to obtain CD25<sup>hi</sup>CD127<sup>low</sup> Tregs of either CD45RO<sup>+</sup>CD45RA<sup>-</sup> (memory), CD45RO<sup>+</sup>CD45RA<sup>+</sup> (transition), and CD45RO<sup>+</sup>CD45RA<sup>-</sup> (naïve) phenotype on the left. Naïve and memory Treg post sort phenotype (FOXP3 and HELIOS expression) assessment on the right. (B) Summary data across donors (n=3) of CD71 surface expression 48h after Treg and effector T (Teff) cell activation. (C) Summary data across donors (n=3) of CD40L surface expression 48h after Treg and Teff cell activation. (D) CD71 surface expression (mean fluorescence intensity – MFI) 48h after CAR naïve and memory Treg activation. (E) CD40L surface expression (%CD40L<sup>+</sup> cells) 48h after CAR naïve and memory Treg activation. (F) Percentage of FOXP3<sup>+</sup>HELIOS<sup>+</sup> cells in CAR naïve and memory Tregs eight days post CAR activation. (G) FOXP3 MFI in CAR naïve and memory Tregs eight days post CAR activation (H) HELIOS MFI in CAR naïve and memory Tregs eight days post CAR activation. (I) Percentage of FOXP3<sup>-</sup>HELIOS<sup>-</sup> cells in CAR naïve and memory Tregs eight days post CAR activation. For Figure S4B and S4C, values represent mean  $\pm$  standard deviation (SD) of technical triplicates per blood donor (n=3). For Figure S4D and S4E, values represent mean of technical triplicates per blood donor (n=3), with lines collecting the data points from the same donor. Statistical significance was assessed using paired Student's t test. For Figure S4F, S4G, S4H, and S4I, values represent technical replicates of representative experiment. Bars represent mean  $\pm$  SD. Statistical significance was assessed using unpaired Student's t test. \*\*\*\*, p < 0.0001; \*\*\*, p < 0.001; \*\*, p < 0.01; \*, p < 0.05; ns, not significant.

**A**

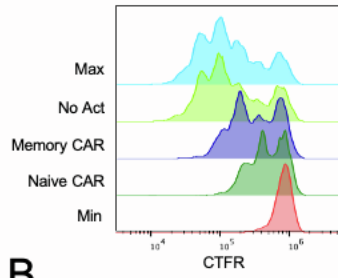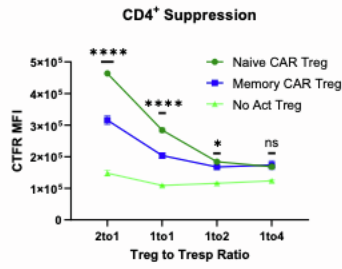

**B**

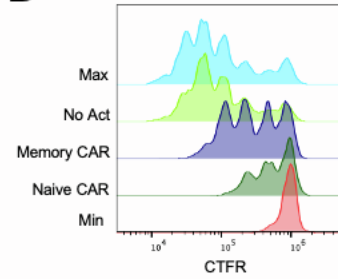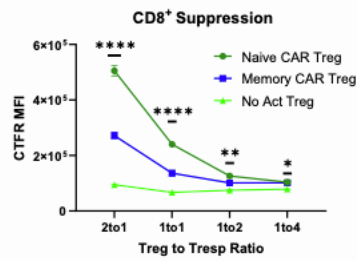

**C**

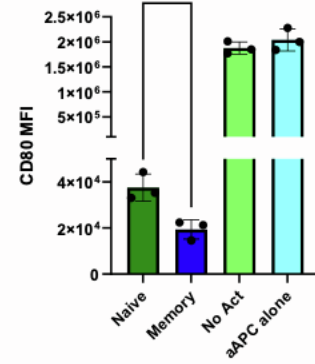

**D**

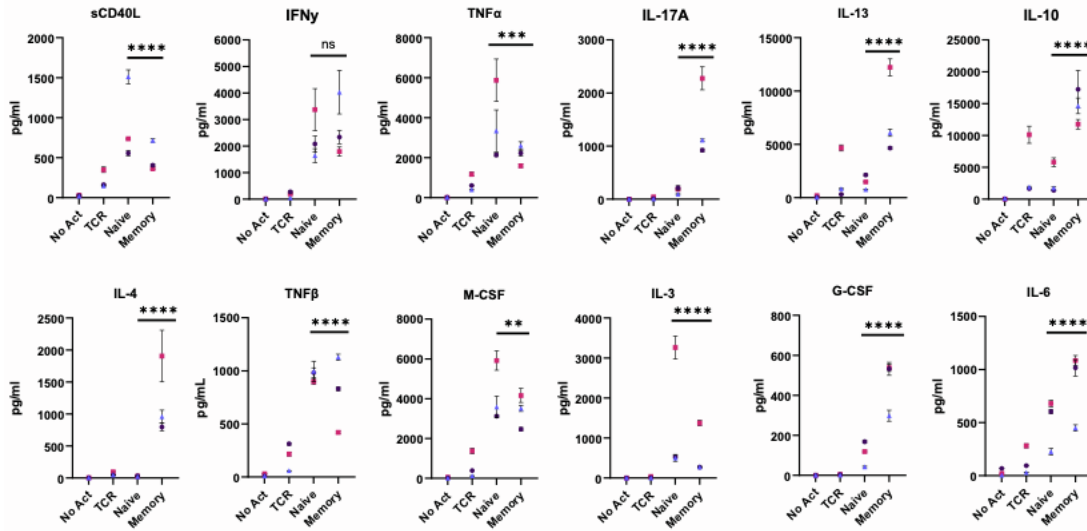

**Figure S5. CAR activation leads to the same levels of IFN $\gamma$  secretion in naïve and memory**

**Tregs.** (A) On the left, representative flow cytometry histograms of proliferation of Cell Trace Far Red (CTFR)-labeled CD4<sup>+</sup> T responder (Tresp) cells co-cultured with activated CAR Tregs at a 2:1 Treg to Tresp ratio. On the right, suppression of proliferation of CTFR-labeled CD4<sup>+</sup> Tresp cells by Tregs at various Treg to Tresp ratios (2:1, 1:1, 1:2, and 1:4). (B) On the left, representative flow cytometry histogram of proliferation of CTFR-labeled CD8<sup>+</sup> Tresp cells co-cultured with activated CAR Tregs at a 2:1 Treg to Tresp ratio. On the right, suppression of proliferation of CTFR-labeled CD8<sup>+</sup> Tresp cells by Tregs at various Treg to Tresp ratios (2:1, 1:1, 1:2, and 1:4). Values represent mean  $\pm$  standard deviation (SD) of technical replicates of representative experiment, with statistical significance computed by one-way ANOVA with Tukey's multiple comparison correction. (C) Representative histograms of downregulation of CD80 surface expression in CD80-CD64-NALM6 cells (aAPC – artificial antigen presenting cells) by Tregs. Bars represent mean  $\pm$  SD of technical replicates of representative experiment, with statistical significance assessed by unpaired Student's t test. (D) Levels of cytokines secreted by No Act Tregs, TCR Tregs, CAR naïve Tregs, and CAR memory Tregs 48h post-activation. Values represent mean  $\pm$  SD of technical triplicates per blood donor (n=3), with statistical significance assessed by one-way ANOVA test with Tukey's multiple comparison correction. \*\*\*\*, p < 0.0001; \*\*\*, p < 0.001; \*\*, p < 0.01; \*, p < 0.05; ns, not significant.

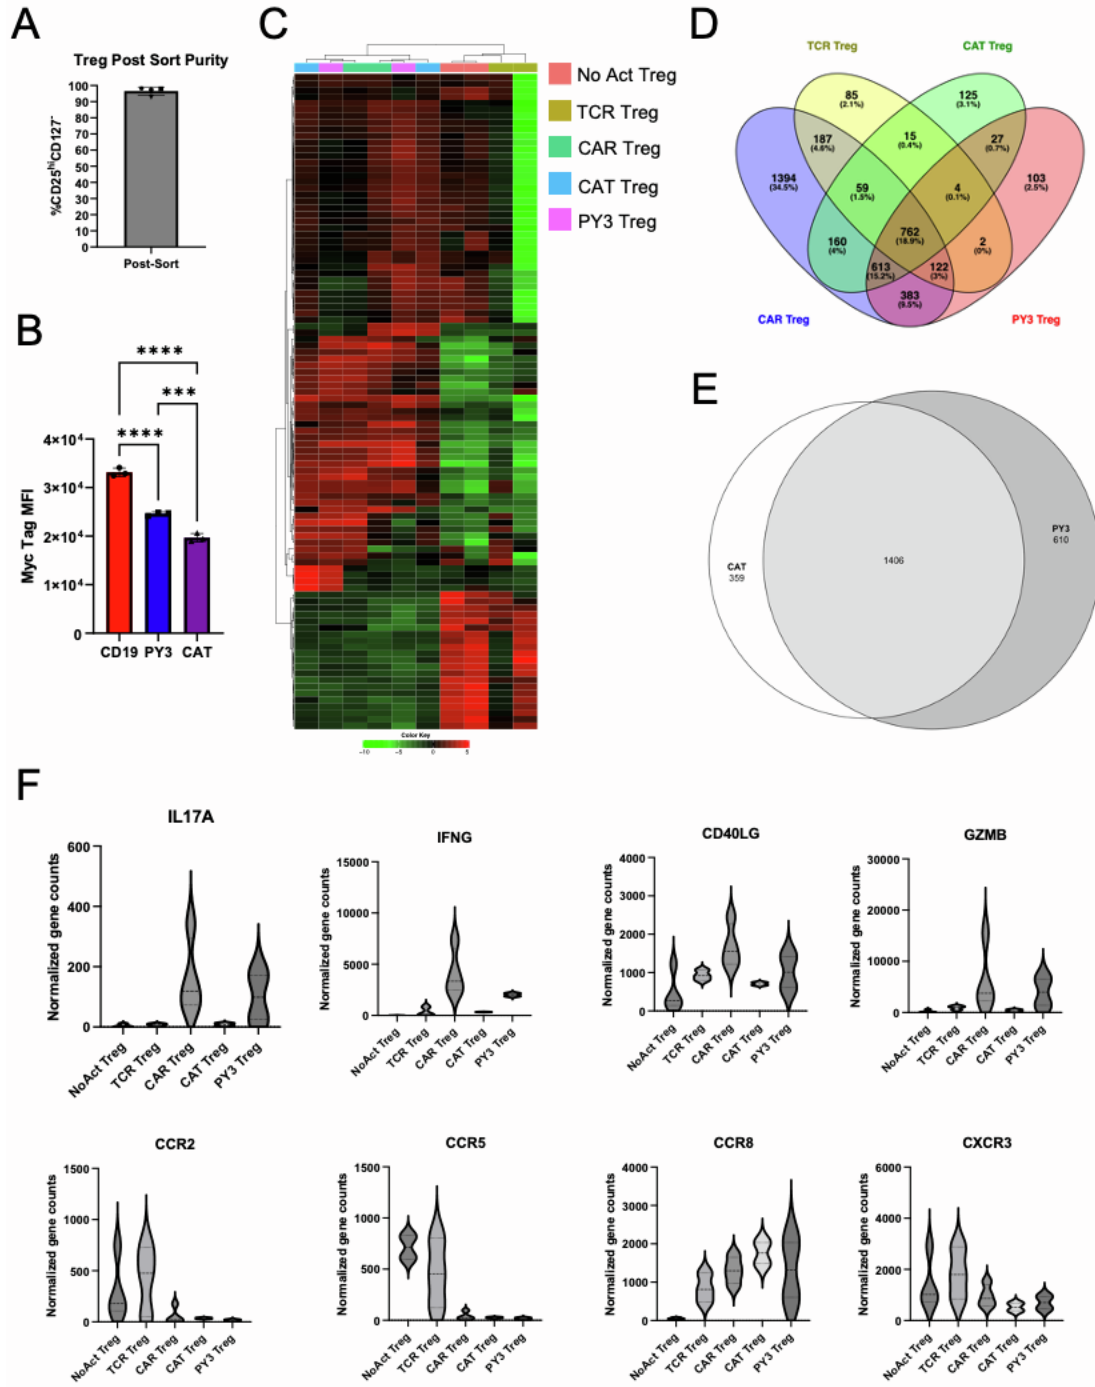

**Figure S6. CAT Tregs have lower inflammatory gene expression levels than CAR Tregs.** (A) Post-sort purity of CD25<sup>hi</sup>CD127<sup>low</sup> Tregs across multiple donors (n=4). (B) Surface expression (Myc-tag) of FMC63 CD19 CAR (CAR), CAT-13.1E10 CD19 CAR (CAT), and mutated CD28 signaling domain FMC63 CD19 CAR (PY3). Bars represent mean +/- SD of technical replicates of representative experiment, with statistical significance computed by one-way ANOVA with Tukey's multiple comparison correction. (C) Heatmap clustered by column (sample) and by row (gene) with top 100 most differentially expressed genes between No Act Tregs, TCR Tregs, CAR Tregs, CAT Tregs, and PY3 Tregs. (D) Venn diagram with genes upregulated in TCR Tregs, CAR Tregs, CAT Tregs, and PY3 Tregs in relation to their respective No Act cell types. Number of genes and respective percentage of the total number of genes are indicated in each intersection. (E) Venn diagram with genes upregulated in CAT Tregs and in PY3 Tregs. (F) Inflammatory, cytotoxic, and chemokine receptor gene expression levels in No Act Tregs, TCR Tregs, CAR Tregs, CAT Tregs, and PY3 Tregs. Violins represent mean  $\pm$  standard deviation (SD) of RNA-seq gene counts from different blood donors.

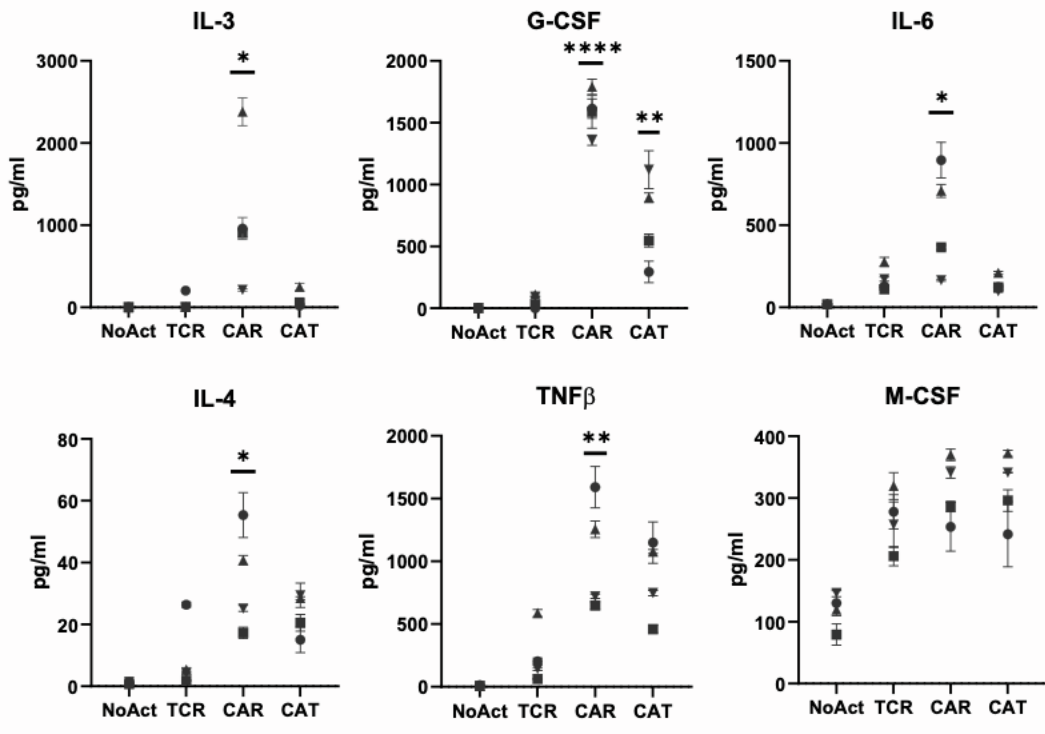

**Figure S7. Lowering CAR affinity leads to lower cytokine secretion.** Cytokine secretion levels by No Act Tregs, TCR Tregs, CAR Tregs, and CAT Tregs 48 hours post activation. Values are the mean  $\pm$  standard deviation (SD) of technical triplicates per blood donor (n=4), with statistical significance assessed by one-way ANOVA with Tukey's multiple comparison correction. \*\*\*\*,  $p < 0.0001$ ; \*\*\*,  $p < 0.001$ ; \*\*,  $p < 0.01$ ; \*,  $p < 0.05$ ; ns, not significant.

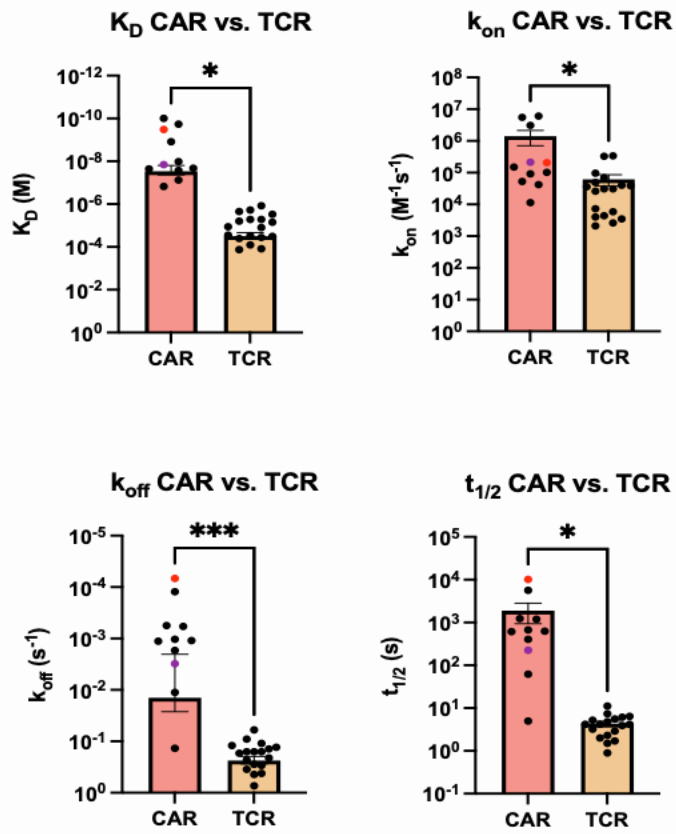



**Figure S8. Chimeric antigen receptors have a higher affinity to their cognate antigens than T cell receptors.** Dissociation constant ( $K_d$ ), association rate constant ( $k_{on}$ ), dissociation rate constant ( $k_{off}$ ), and residence time ( $t_{1/2}$ ) values for commonly used chimeric antigen receptors (CARs) to their respective targets, and well-studied T cell receptors (TCRs) to their respective cognate peptide-MHC complexes from the literature. Red dots represent FMC63 CD19 CAR (CAR) and purple dots represent CAT-13.1E10 CD19 CAR (CAT). Bars represent mean  $\pm$  standard error of the mean (SEM), with statistical significance assessed by unpaired Student's t test. \*\*\*\*,  $p < 0.0001$ ; \*\*\*,  $p < 0.001$ ; \*\*,  $p < 0.01$ ; \*,  $p < 0.05$ ; ns, not significant.

## **SUPPLEMENTAL TABLES**

**Table S1. Differentially expressed genes in CAR Tregs compared with NoAct Tregs.**

**Table S2. Differentially expressed genes in TCR Tregs compared with NoAct Tregs.**

**Table S3. Differentially expressed genes in CAR Teff compared with NoAct Teff.**

**Table S4. Differentially expressed genes in TCR Teff compared with NoAct Teff.**

**Table S5. Differentially expressed genes in CAR Tregs compared with TCR Tregs.**

**Table S6. Genes upregulated in CAR Tregs, CAR Teff, and TCR Teff, but not in TCR Tregs.**

**Table S7. Genes upregulated only in TCR Tregs and not in CAR Tregs, CAR Teff or TCR Teff.**

**Table S8. Genes upregulated in PY3 Tregs and not in CAT Tregs.**

**Table S9. Flow cytometry antibodies and dyes used in this study.**

| Antigen | Clone  | Fluorophore          | Dilution | Vendor    | Catalog # |
|---------|--------|----------------------|----------|-----------|-----------|
| CD4     | SK3    | FITC                 | 1:100    | BioLegend | 980802    |
| CD4     | SK3    | Pacific Blue         | 1:100    | BioLegend | 344619    |
| CD4     | SK3    | Alexa Fluor 700      | 1:100    | BioLegend | 344621    |
| CD4     | SK3    | PE-Cy7               | 1:100    | BioLegend | 344611    |
| CD8     | SK1    | PE                   | 1:100    | BioLegend | 344706    |
| CD8     | SK1    | PerCP                | 1:100    | BioLegend | 344707    |
| CD25    | BC96   | APC                  | 1:100    | BioLegend | 302610    |
| CD45RA  | HI100  | PE                   | 1:100    | BioLegend | 304107    |
| CD45RO  | UCHL1  | BV421                | 1:100    | BioLegend | 304223    |
| CD71    | CY1G4  | PE                   | 1:100    | BioLegend | 334105    |
| CD80    | 2D10   | APC                  | 1:100    | BioLegend | 305220    |
| CD83    | HB15e  | Brilliant Violet 421 | 1:100    | BioLegend | 305324    |
| CD86    | IT2.2  | PE                   | 1:100    | BioLegend | 305406    |
| CD127   | A019D5 | PE                   | 1:100    | BioLegend | 351304    |
| CD127   | A019D5 | FITC                 | 1:100    | BioLegend | 351311    |

|                      |           |                      |        |                                |                  |
|----------------------|-----------|----------------------|--------|--------------------------------|------------------|
| CD154                | 24-31     | APC                  | 1:100  | Biolegend                      | 310809           |
| CellTrace<br>Violet  | N/A       | CellTrace<br>Violet  | 1:1000 | ThermoFisher                   | C34571           |
| CellTrace<br>Far Red | N/A       | CellTrace Far<br>Red | 1:350  | ThermoFisher                   | C34572           |
| FOXP3                | PCH101    | eFluor 450           | 1:50   | eBioscience                    | 48-4776-<br>42   |
| FOXP3                | PCH101    | PE/Cy5.5             | 1:50   | ThermoFisher                   | 35-4776-<br>42   |
| Ghost                | N/A       | Red 780              | 1:500  | Tonbo Biosciences              | 13-0865-<br>T500 |
| HELIOS               | 22F6      | PE                   | 1:50   | BioLegend                      | 137216           |
| IFNG                 | 4S.B3     | BV510                | 1:50   | Biolegend                      | 502543           |
| IL2                  | MQ1-17H12 | Alexa Fluor 647      | 1:50   | Biolegend                      | 500315           |
| Live-or-Dye          | N/A       | 594/614              | 1:500  | Biotium                        | 32006            |
| MYC-tag              | 9B11      | Alexa Fluor 647      | 1:100  | Cell Signaling<br>Technologies | 2233S            |
| TIGIT                | A15153G   | Brilliant Violet 785 | 1:100  | Biolegend                      | 372735           |

**Table S10. Primers used in this study.**

| <b>Gene</b>  | <b>Direction</b> | <b>Oligo sequence (5' to 3')</b> |
|--------------|------------------|----------------------------------|
| Human IFNG   | FW               | TCCCATGGGTTGTGTGTTA              |
| Human IFNG   | REV              | AAGCACCAGGCATGAAATCT             |
| Human GZMB   | FW               | GGTGGCTTCCTGATACGAGACG           |
| Human GZMB   | REV              | GGTCGGCTCCTGTTCTTTGAT            |
| Human CD40LG | FW               | GCGGCACATGTCATAAGTGAGG           |
| Human CD40LG | REV              | GTCCTTGTCTTTTAACGGTCAGC          |
| Human TIGIT  | FW               | TGGTGGTCATCTGCACAGCAGT           |
| Human TIGIT  | REV              | TTTCTCCTGAGGTCACCTTCCAC          |
| Human TBX21  | FW               | ATTGCCGTGACTGCCTACCAGA           |
| Human TBX21  | REV              | GGAATTGACAGTTGGGTCCAGG           |
| Human GATA3  | FW               | ACCACAACCACACTCTGGAGGA           |
| Human GATA3  | REV              | TCGGTTTCTGGTCTGGATGCCT           |
| Human RORC   | FW               | GAGGAAGTGACTGGCTACCAGA           |
| Human RORC   | REV              | GCACAATCTGGTCATTCTGGCAG          |
| Human STAT1  | FW               | GGCAAAGAGTGATCAGAAACAA           |
| Human STAT1  | REV              | GTTCAGTGACATTGAGCAACTC           |
| Human RPL13a | FW               | CATAGGAAGCTGGGAGCAAG             |
| Human RPL13a | REV              | GCCCTCCAATCAGTCTTCTG             |

**Table S11. Sequences of constructs used in this study.**
